# Supplementary material for: Characterizing the influence of various antimicrobials used for metaphylaxis against bovine respiratory disease on host transcriptome responses
Source: Front Vet Sci. 2023 Oct 5;10:1272940. doi: 10.3389/fvets.2023.1272940 (PMC10585045; doi:10.3389/fvets.2023.1272940)
Supplement: Supplementary file 9 [file Table_9.XLSX]

## Sheet: CEFT 
Supplmental File S9: Functional enrichment pathways and GO terms of timepoint:group interactions for CEFT vs NC (FDR < 0.05)
##Databases: KEGG PATHWAY, Reactome, Gene Ontology
##Statistical test method: hypergeometric test / Fisher's exact test
##FDR correction method: Benjamini and Hochberg
#Term	Database	ID	Input number	Background number	P-Value	Corrected P-Value	Input	Hyperlink
African trypanosomiasis	KEGG PATHWAY	bta05143	4	44	0.000267484	0.0176551	IFNG|HBG|ICAM1|HBB	http://www.genome.jp/kegg-bin/show_pathway?bta05143/bta:281237%09red/bta:280813%09red/bta:281839%09red/bta:511735%09red
Binding and Uptake of Ligands by Scavenger Receptors	Reactome	R-BTA-2173782	3	17	0.000282733	0.0176551	HBG|CD36|HBB	http://www.reactome.org/cgi-bin/eventbrowser_st_id?ST_ID=R-BTA-2173782
Chaperone Mediated Autophagy	Reactome	R-BTA-9613829	3	12	0.000115576	0.0092791	HBG|PRKAA2|HBB	http://www.reactome.org/cgi-bin/eventbrowser_st_id?ST_ID=R-BTA-9613829
Developmental Biology	Reactome	R-BTA-1266738	8	184	3.87952e-05	0.00469687	KRT71|GAP43|KRT31|KRT83|KRT85|KRT25|SPTA1|KRT27	http://www.reactome.org/cgi-bin/eventbrowser_st_id?ST_ID=R-BTA-1266738
Estrogen signaling pathway	KEGG PATHWAY	bta04915	6	138	0.000366526	0.0205988	KRT31|KRT23|KRT35|KRT27|KRT25|CREB3L3	http://www.genome.jp/kegg-bin/show_pathway?bta04915/bta:513010%09red/bta:536311%09red/bta:511540%09red/bta:618453%09red/bta:510914%09red/bta:521074%09red
Formation of the cornified envelope	Reactome	R-BTA-6809371	6	46	1.09622e-06	0.000308037	KRT71|KRT31|KRT83|KRT85|KRT27|KRT25	http://www.reactome.org/cgi-bin/eventbrowser_st_id?ST_ID=R-BTA-6809371
Human papillomavirus infection	KEGG PATHWAY	bta05165	9	345	0.000539545	0.0260847	MX1|PPP2R2B|CREB3L3|IFNAH|ATR|LAMC3|PATJ|HEY2|HES6	http://www.genome.jp/kegg-bin/show_pathway?bta05165/bta:280872%09red/bta:513010%09red/bta:509290%09red/bta:538619%09red/bta:531384%09red/bta:504869%09red/bta:100329207%09red/bta:518914%09red/bta:536993%09red
Keratinization	Reactome	R-BTA-6805567	6	62	5.40775e-06	0.00101305	KRT71|KRT31|KRT83|KRT85|KRT27|KRT25	http://www.reactome.org/cgi-bin/eventbrowser_st_id?ST_ID=R-BTA-6805567
Malaria	KEGG PATHWAY	bta05144	7	59	2.44513e-07	0.000157305	IFNG|HBG|ACKR1|CD36|HBB|ICAM1|GYPA	http://www.genome.jp/kegg-bin/show_pathway?bta05144/bta:617836%09red/bta:511735%09red/bta:281052%09red/bta:281237%09red/bta:528076%09red/bta:280813%09red/bta:281839%09red
Microautophagy	Reactome	R-BTA-9615710	3	22	0.000556969	0.0260847	HBG|PRKAA2|HBB	http://www.reactome.org/cgi-bin/eventbrowser_st_id?ST_ID=R-BTA-9615710
Muscle contraction	Reactome	R-BTA-397014	6	91	4.17871e-05	0.00469687	TNNT1|ACTA1|CASQ1|DES|MYBPC1|MYL1	http://www.reactome.org/cgi-bin/eventbrowser_st_id?ST_ID=R-BTA-397014
PI3K-Akt signaling pathway	KEGG PATHWAY	bta04151	9	373	0.000924469	0.0335195	PDGFC|EFNA3|PRKAA2|PPP2R2B|CREB3L3|IFNAH|LPAR3|LAMC3|FLT1	http://www.genome.jp/kegg-bin/show_pathway?bta04151/bta:532829%09red/bta:513010%09red/bta:509290%09red/bta:538954%09red/bta:613787%09red/bta:100329207%09red/bta:518914%09red/bta:540776%09red/bta:503620%09red
Scavenging of heme from plasma	Reactome	R-BTA-2168880	2	7	0.00146377	0.0421865	HBG|HBB	http://www.reactome.org/cgi-bin/eventbrowser_st_id?ST_ID=R-BTA-2168880
Striated Muscle Contraction	Reactome	R-BTA-390522	5	18	3.3414e-07	0.000157305	TNNT1|ACTA1|DES|MYBPC1|MYL1	http://www.reactome.org/cgi-bin/eventbrowser_st_id?ST_ID=R-BTA-390522
#Term	Database	ID	Input number	Background number	P-Value	Corrected P-Value	Input	Hyperlink
ammonium transmembrane transport	Gene Ontology	GO:0072488	2	6	0.00114337	0.0377983	RHCG|RHAG	http://amigo.geneontology.org/amigo/term/GO:0072488
ammonium transmembrane transporter activity	Gene Ontology	GO:0008519	2	8	0.0018219	0.0455071	RHCG|RHAG	http://amigo.geneontology.org/amigo/term/GO:0008519
ammonium transport	Gene Ontology	GO:0015696	2	5	0.000861201	0.0322663	RHCG|RHAG	http://amigo.geneontology.org/amigo/term/GO:0015696
ankyrin binding	Gene Ontology	GO:0030506	3	18	0.000328283	0.0194205	RHCG|RHAG|KCNQ2	http://amigo.geneontology.org/amigo/term/GO:0030506
calcium ion binding	Gene Ontology	GO:0005509	11	560	0.00133417	0.0421865	RAB11FIP3|PCDHGC3|TPO|CDH22|SYT4|SPTA1|EFEMP1|TCHH|TNNC2|MYL1|EDIL3	http://amigo.geneontology.org/amigo/term/GO:0005509
cell surface receptor signaling pathway	Gene Ontology	GO:0007166	5	95	0.00049932	0.0255107	OSTN|ADGRF3|GPR157|CD36|CTF1	http://amigo.geneontology.org/amigo/term/GO:0007166
cellular response to calcium ion	Gene Ontology	GO:0071277	4	57	0.000671823	0.0290434	SYT4|CPNE8|CPNE7|PRKAA2	http://amigo.geneontology.org/amigo/term/GO:0071277
dorsal aorta morphogenesis	Gene Ontology	GO:0035912	2	6	0.00114337	0.0377983	BMPR1A|HEY2	http://amigo.geneontology.org/amigo/term/GO:0035912
extracellular space	Gene Ontology	GO:0005615	17	952	0.000207519	0.0145782	OSTN|PCSK1N|SERPINA3-8|AMN|IFNG|CATHL4|OVOS2|AZU1|TPO|EFEMP1|IFNAH|BTC|CKM|LRRC3B|LINGO2|PXDN|SOD3	http://amigo.geneontology.org/amigo/term/GO:0005615
hair follicle morphogenesis	Gene Ontology	GO:0031069	3	23	0.00062662	0.0281728	KRT71|KRT27|KRT25	http://amigo.geneontology.org/amigo/term/GO:0031069
heparan sulfate proteoglycan binding	Gene Ontology	GO:0043395	2	7	0.00146377	0.0421865	ATP1A3|AZU1	http://amigo.geneontology.org/amigo/term/GO:0043395
intermediate filament	Gene Ontology	GO:0005882	6	52	2.1102e-06	0.000474373	KRT31|KRT23|DES|KRT35|KRT27|KRT25	http://amigo.geneontology.org/amigo/term/GO:0005882
intermediate filament organization	Gene Ontology	GO:0045109	4	19	1.38162e-05	0.00194118	DES|TCHH|KRT71|KRT25	http://amigo.geneontology.org/amigo/term/GO:0045109
mitral valve morphogenesis	Gene Ontology	GO:0003183	2	6	0.00114337	0.0377983	TWIST1|BMPR1A	http://amigo.geneontology.org/amigo/term/GO:0003183
motor activity	Gene Ontology	GO:0003774	4	33	9.59859e-05	0.00829909	MYH2|MYO18B|MYH1|MYH7	http://amigo.geneontology.org/amigo/term/GO:0003774
muscle contraction	Gene Ontology	GO:0006936	4	32	8.60437e-05	0.00829909	TNNT1|MYH2|MYBPC1|MYL1	http://amigo.geneontology.org/amigo/term/GO:0006936
myofibril	Gene Ontology	GO:0030016	5	19	4.19854e-07	0.000157305	MYH2|MYH1|MYH7|MYBPC1|MYL1	http://amigo.geneontology.org/amigo/term/GO:0030016
myosin complex	Gene Ontology	GO:0016459	5	40	1.08062e-05	0.00173517	MYH2|MYH1|MYO1B|MYH7|MYL1	http://amigo.geneontology.org/amigo/term/GO:0016459
neuron development	Gene Ontology	GO:0048666	3	33	0.00164076	0.0449809	MYT1L|ALK|CTF1	http://amigo.geneontology.org/amigo/term/GO:0048666
peroxidase activity	Gene Ontology	GO:0004601	3	24	0.000701594	0.0292071	TPO|PXDN|HBB	http://amigo.geneontology.org/amigo/term/GO:0004601
positive regulation of vascular endothelial growth factor receptor signaling pathway	Gene Ontology	GO:0030949	2	8	0.0018219	0.0455071	MT3|FLT1	http://amigo.geneontology.org/amigo/term/GO:0030949
protein dimerization activity	Gene Ontology	GO:0046983	5	127	0.00173684	0.0455071	ANO2|HEY2|TCF21|HES6|NHLH2	http://amigo.geneontology.org/amigo/term/GO:0046983
receptor internalization	Gene Ontology	GO:0031623	3	32	0.0015112	0.0424647	RAMP1|CD36|MX1	http://amigo.geneontology.org/amigo/term/GO:0031623
regulation of muscle contraction	Gene Ontology	GO:0006937	2	5	0.000861201	0.0322663	TNNT1|TNNC2	http://amigo.geneontology.org/amigo/term/GO:0006937
response to hypoxia	Gene Ontology	GO:0001666	4	77	0.00193686	0.0473269	PLOD2|MT3|SOD3|ARNT	http://amigo.geneontology.org/amigo/term/GO:0001666
RNA polymerase II transcription regulatory region sequence-specific DNA binding	Gene Ontology	GO:0000977	7	205	0.000490348	0.0255107	LHX3|TWIST1|PURB|DMRT3|HEY2|TCF21|HES6	http://amigo.geneontology.org/amigo/term/GO:0000977
sarcomere organization	Gene Ontology	GO:0045214	3	25	0.000782047	0.0313936	TNNT1|LDB3|CASQ1	http://amigo.geneontology.org/amigo/term/GO:0045214
spinal cord motor neuron cell fate specification	Gene Ontology	GO:0021520	2	7	0.00146377	0.0421865	ISL2|LHX3	http://amigo.geneontology.org/amigo/term/GO:0021520
structural molecule activity	Gene Ontology	GO:0005198	6	105	8.88331e-05	0.00829909	UPK3A|KRT31|KRT23|KRT35|KRT27|KRT25	http://amigo.geneontology.org/amigo/term/GO:0005198
troponin complex	Gene Ontology	GO:0005861	2	8	0.0018219	0.0455071	TNNT1|TNNC2	http://amigo.geneontology.org/amigo/term/GO:0005861
ventricular cardiac muscle cell development	Gene Ontology	GO:0055015	2	7	0.00146377	0.0421865	LMNA|HEY2	http://amigo.geneontology.org/amigo/term/GO:0055015
Z disc	Gene Ontology	GO:0030018	5	75	0.00017699	0.0132624	LDB3|MYO18B|DES|MYH7|MYOZ1	http://amigo.geneontology.org/amigo/term/GO:0030018

## Sheet: ENRO
Functional enrichment pathways and GO terms of timepoint x group interactions for ENRO vs NC (FDR < 0.05)
##Databases: KEGG PATHWAY, Reactome, Gene Ontology
##Statistical test method: hypergeometric test / Fisher's exact test
##FDR correction method: Benjamini and Hochberg
#Term	Database	ID	Input number	Background number	P-Value	Corrected P-Value	Input	Hyperlink
Arachidonic acid metabolism	Reactome	R-BTA-2142753	3	30	0.000404077	0.0298918	PTGDS|PTGES|MGC127133	http://www.reactome.org/cgi-bin/eventbrowser_st_id?ST_ID=R-BTA-2142753
Arachidonic acid metabolism	KEGG PATHWAY	bta00590	3	83	0.00640679	0.0835629	PTGDS|PTGES|MGC127133	http://www.genome.jp/kegg-bin/show_pathway?bta00590/bta:510180%09red/bta:286858%09red/bta:282019%09red
Cardiac conduction	Reactome	R-BTA-5576891	4	62	0.00020331	0.0227497	CACNG1|KCND3|CACNA1D|SCN2B	http://www.reactome.org/cgi-bin/eventbrowser_st_id?ST_ID=R-BTA-5576891
Insulin secretion	KEGG PATHWAY	bta04911	4	85	0.000637497	0.0400462	STX1A|CREB3L3|ADCY8|CACNA1D	http://www.genome.jp/kegg-bin/show_pathway?bta04911/bta:788566%09red/bta:408013%09red/bta:535017%09red/bta:513010%09red
Muscle contraction	Reactome	R-BTA-397014	4	91	0.000814633	0.0400462	CACNG1|KCND3|CACNA1D|SCN2B	http://www.reactome.org/cgi-bin/eventbrowser_st_id?ST_ID=R-BTA-397014
Phase 0 - rapid depolarisation	Reactome	R-BTA-5576892	3	21	0.000154266	0.0227497	CACNG1|CACNA1D|SCN2B	http://www.reactome.org/cgi-bin/eventbrowser_st_id?ST_ID=R-BTA-5576892
Synthesis of Prostaglandins (PG) and Thromboxanes (TX)	Reactome	R-BTA-2162123	3	8	1.31098e-05	0.00665308	PTGDS|PTGES|MGC127133	http://www.reactome.org/cgi-bin/eventbrowser_st_id?ST_ID=R-BTA-2162123
#Term	Database	ID	Input number	Background number	P-Value	Corrected P-Value	Input	Hyperlink
axon terminus	Gene Ontology	GO:0043679	3	26	0.000274093	0.0227497	SNCG|ROR1|SYT7	http://amigo.geneontology.org/amigo/term/GO:0043679
cardiac muscle cell action potential involved in contraction	Gene Ontology	GO:0086002	2	8	0.000833382	0.0400462	SCN2B|CACNA1D	http://amigo.geneontology.org/amigo/term/GO:0086002
chloride channel activity	Gene Ontology	GO:0005254	3	39	0.000826194	0.0400462	GABRP|ANO2|SLC26A7	http://amigo.geneontology.org/amigo/term/GO:0005254
chloride transmembrane transport	Gene Ontology	GO:1902476	4	76	0.000425622	0.0298918	SLC1A1|GABRP|ANO2|SLC26A7	http://amigo.geneontology.org/amigo/term/GO:1902476
extracellular space	Gene Ontology	GO:0005615	15	952	2.21021e-05	0.00665524	CCL2|SERPINA1|PCSK1N|LINGO2|ADAMTS3|SEMA3F|OXT|CATHL4|CD1A|RARRES2|SPOCK1|PTGDS|SCGB1A1|SERPINB5|AHSG	http://amigo.geneontology.org/amigo/term/GO:0005615
integral component of membrane	Gene Ontology	GO:0016021	31	3697	0.000266792	0.0227497	STX1A|GHR|CD1A|ATRAID|ANO2|KREMEN2|EDNRA|GJC1|NKG2A|UPK3A|COX3|RNF182|TMEM202|MSMB|RNF222|KCND3|TMEM240|DLL3|PRTG|PTGES|KLRG2|GPR152|KEL|LYPD6B|SYT7|TMEM213|CREB3L3|SLC22A7|SIGLEC5|IL17RE|SLC1A1	http://amigo.geneontology.org/amigo/term/GO:0016021
L-type voltage-gated calcium channel complex	Gene Ontology	GO:1990454	2	7	0.000668618	0.0400462	CACNG1|CACNA1D	http://amigo.geneontology.org/amigo/term/GO:1990454
negative regulation of endopeptidase activity	Gene Ontology	GO:0010951	5	125	0.000272527	0.0227497	SERPINA1|PCSK1N|SERPINB5|SPOCK1|AHSG	http://amigo.geneontology.org/amigo/term/GO:0010951
plasma membrane	Gene Ontology	GO:0005886	25	2339	2.91577e-05	0.00665524	STX1A|GHR|CD1A|MYO1B|ANO2|MX1|AHSG|EDNRA|DNAAF1|FYB2|UPK3A|KREMEN2|SLC9A3R2|DPP6|GRID1|PRTG|PLSCR4|KEL|GRIK2|GRB14|SYT7|SLC6A15|SIGLEC5|SLC1A1|SCN3A	http://amigo.geneontology.org/amigo/term/GO:0005886
postsynaptic density	Gene Ontology	GO:0014069	5	124	0.000262956	0.0227497	KCND3|FAM196A|ADCY8|GRIK2|MX1	http://amigo.geneontology.org/amigo/term/GO:0014069
postsynaptic membrane	Gene Ontology	GO:0045211	5	85	4.8088e-05	0.00878086	GRIK2|GABRP|GRID1|KCND3|MX1	http://amigo.geneontology.org/amigo/term/GO:0045211
presynaptic membrane	Gene Ontology	GO:0042734	3	38	0.000769626	0.0400462	STX1A|GRIK2|SYT7	http://amigo.geneontology.org/amigo/term/GO:0042734
regulation of heart rate by cardiac conduction	Gene Ontology	GO:0086091	4	30	1.45741e-05	0.00665308	SCN2B|KCND3|CACNA1D|CTNNA3	http://amigo.geneontology.org/amigo/term/GO:0086091

## Sheet: FLOR
Functional enrichment pathways and GO terms of timepoint x group interactions for FLOR vs NC (FDR < 0.05)
##Databases: KEGG PATHWAY, Reactome, Gene Ontology
##Statistical test method: hypergeometric test / Fisher's exact test
##FDR correction method: Benjamini and Hochberg
#Term	Database	ID	Input number	Background number	P-Value	Corrected P-Value	Input	Hyperlink
Human papillomavirus infection	KEGG PATHWAY	bta05165	9	345	0.000309032	0.0351369	COL6A2|CCND3|THBS2|MX1|CREB3L3|WNT4|LAMB3|TNN|HES6	http://www.genome.jp/kegg-bin/show_pathway?bta05165/bta:280872%09red/bta:517433%09red/bta:789600%09red/bta:513010%09red/bta:531384%09red/bta:282194%09red/bta:540547%09red/bta:529939%09red/bta:338092%09red
Pathways in cancer	KEGG PATHWAY	bta05200	11	539	0.000525791	0.0464627	ARNT|CCND3|GSTM3|ADCY8|WNT4|MAPK10|FGF9|EDNRB|LAMB3|ARNT2|CTNNA3	http://www.genome.jp/kegg-bin/show_pathway?bta05200/bta:613731%09red/bta:535017%09red/bta:529939%09red/bta:615507%09red/bta:533445%09red/bta:281010%09red/bta:540547%09red/bta:780777%09red/bta:537631%09red/bta:281750%09red/bta:789600%09red
#Term	Database	ID	Input number	Background number	P-Value	Corrected P-Value	Input	Hyperlink
calcium ion binding	Gene Ontology	GO:0005509	17	560	8.44272e-08	9.59937e-05	PRRG4|RAB11FIP3|PLS3|MATN2|PROZ|SYT4|THBS2|DUOX2|CRTAC1|SYT7|FAT3|PAMR1|TCHH|HMCN1|CALR3|PON1|DNER	http://amigo.geneontology.org/amigo/term/GO:0005509
cell differentiation	Gene Ontology	GO:0030154	9	312	0.000149953	0.0243567	SOX18|ARNT|FOXE1|EHF|FGF9|TCF23|CALR3|HES6|ATOH8	http://amigo.geneontology.org/amigo/term/GO:0030154
collagen-containing extracellular matrix	Gene Ontology	GO:0062023	5	85	0.000215742	0.0306623	ZP2|MATN2|THBS2|GPC3|COL6A2	http://amigo.geneontology.org/amigo/term/GO:0062023
defense response to Gram-negative bacterium	Gene Ontology	GO:0050829	5	46	1.39285e-05	0.00316734	LBP|CAMP|CATHL2|ADGRB1|CATHL1	http://amigo.geneontology.org/amigo/term/GO:0050829
dendrite	Gene Ontology	GO:0030425	7	201	0.000275947	0.0348613	SYT4|ADCY8|LYNX1|SYT7|GABRD|ADGRB1|DNER	http://amigo.geneontology.org/amigo/term/GO:0030425
extracellular region	Gene Ontology	GO:0005576	10	454	0.000531236	0.0464627	PRRG4|PROZ|WFIKKN1|ENPP6|PAMR1|THBS2|GPC3|AHSG|HTRA4|MSMB	http://amigo.geneontology.org/amigo/term/GO:0005576
extracellular space	Gene Ontology	GO:0005615	19	952	6.7539e-06	0.00255973	SMPDL3B|LBP|COL6A2|PROZ|CD1A|PON1|CAMP|CATHL2|CPA5|FGF9|CHRD|AHSG|SERPINA3-8|CATHL1|WNT4|NRG2|DEFB10|ADGRB1|PRTN3	http://amigo.geneontology.org/amigo/term/GO:0005615
hair follicle morphogenesis	Gene Ontology	GO:0031069	3	23	0.000501622	0.0464627	KRT71|FOXE1|KRT25	http://amigo.geneontology.org/amigo/term/GO:0031069
hydrogen peroxide biosynthetic process	Gene Ontology	GO:0050665	2	5	0.000739918	0.0494874	CYP1A1|DUOX2	http://amigo.geneontology.org/amigo/term/GO:0050665
integral component of membrane	Gene Ontology	GO:0016021	38	3697	0.000728696	0.0494874	STX1A|CLEC10A|CD1A|LIFR|ENTPD3|LHFPL6|SYT7|EDNRB|GPRC5B|TMEM213|GRAMD2A|TMEM182|ZP2|WC1-8|SUSD5|CD163L1|NRG2|MSMB|CDCP1|TMEM121|RAMP1|SERP2|ABCB11|ULBP13|KIR3DS1|KIR3DL1|UCP3|F11R|DNER|PRRG4|GALNT15|SLC17A7|SYNGR4|GJC1|FAT3|CREB3L3|ABCC8|TMEM151B	http://amigo.geneontology.org/amigo/term/GO:0016021
intermediate filament organization	Gene Ontology	GO:0045109	4	19	1.02229e-05	0.00290585	TCHH|KRT71|DSP|KRT25	http://amigo.geneontology.org/amigo/term/GO:0045109
lipopolysaccharide binding	Gene Ontology	GO:0001530	5	32	2.76651e-06	0.00157276	LBP|CAMP|CATHL2|ADGRB1|CATHL1	http://amigo.geneontology.org/amigo/term/GO:0001530
neuronal cell body	Gene Ontology	GO:0043025	7	156	6.09882e-05	0.0115573	GRIK2|SYT4|PCP2|SYT7|GABRD|TNN|DNER	http://amigo.geneontology.org/amigo/term/GO:0043025
syndecan binding	Gene Ontology	GO:0045545	2	5	0.000739918	0.0494874	CHRD|GPNMB	http://amigo.geneontology.org/amigo/term/GO:0045545
transmitter-gated ion channel activity involved in regulation of postsynaptic membrane potential	Gene Ontology	GO:1904315	3	25	0.000626489	0.0494874	GABRD|GRIK2|GRIA3	http://amigo.geneontology.org/amigo/term/GO:1904315

## Sheet: OXYT
Functional enrichment pathways and GO terms of timepoint x group interactions for OXYT vs NC (FDR < 0.05)
##Databases: KEGG PATHWAY, Reactome, Gene Ontology
##Statistical test method: hypergeometric test / Fisher's exact test
##FDR correction method: Benjamini and Hochberg
#Term	Database	ID	Input number	Background number	P-Value	Corrected P-Value	Input	Hyperlink
Human papillomavirus infection	KEGG PATHWAY	bta05165	8	345	0.000134325	0.0260926	FZD1|THBS4|MX1|CREB3L3|IFNAH|ATR|ATP6V1G2|PATJ	http://www.genome.jp/kegg-bin/show_pathway?bta05165/bta:280872%09red/bta:513010%09red/bta:541281%09red/bta:445417%09red/bta:504869%09red/bta:514368%09red/bta:100329207%09red/bta:536993%09red
#Term	Database	ID	Input number	Background number	P-Value	Corrected P-Value	Input	Hyperlink
calcium ion binding	Gene Ontology	GO:0005509	11	560	3.24928e-05	0.0230889	MATN1|PLS3|HPCAL4|THBS4|SYT4|CD93|SYT7|FAT3|TCHH|SPOCK1|FBLN5	http://amigo.geneontology.org/amigo/term/GO:0005509
integral component of membrane	Gene Ontology	GO:0016021	32	3697	5.94309e-05	0.0230889	CD1B|GPR135|SLC6A5|CD1A|UGT8|ANO2|CD300LG|LRRC3B|GJC1|FAM189A1|TMEM132B|GDPD2|OR12D2|NSG2|ABCB6|TNFSF4|WC1-10|SDK2|FMO1|ABCB11|GGT1|TAAR1|LRP3|GPR157|SLC25A45|FAM174B|CD93|SYT7|FAT3|CREB3L3|NKG2A|SIGLEC5	http://amigo.geneontology.org/amigo/term/GO:0016021
plasma membrane	Gene Ontology	GO:0005886	23	2339	0.000134132	0.0260926	SLC6A5|CD1A|ANO2|MX1|GPR135|OR12D2|ARHGEF5|ABCB6|GRID1|GGT1|FRMPD1|DTNA|PNOC|FAT3|SMPDL3B|FAM174B|GRIK2|SYT4|CD93|SYT7|GDPD2|SIGLEC5|SCN3A	http://amigo.geneontology.org/amigo/term/GO:0005886

## Sheet: TILD
Functional enrichment pathways and GO terms of timepoint x group interactions for TILD vs NC (FDR < 0.05)
##Databases: KEGG PATHWAY, Reactome, Gene Ontology
##Statistical test method: hypergeometric test / Fisher's exact test
##FDR correction method: Benjamini and Hochberg
#Term	Database	ID	Input number	Background number	P-Value	Corrected P-Value	Input	Hyperlink
Chaperone Mediated Autophagy	Reactome	R-BTA-9613829	3	12	0.000144614	0.0222224	HBG|PRKAA2|HBB	http://www.reactome.org/cgi-bin/eventbrowser_st_id?ST_ID=R-BTA-9613829
Cholesterol metabolism	KEGG PATHWAY	bta04979	4	50	0.000561093	0.0456466	VDAC3|APOA4|LIPC|VAPA	http://www.genome.jp/kegg-bin/show_pathway?bta04979/bta:537301%09red/bta:516024%09red/bta:535192%09red/bta:282716%09red
ECM-receptor interaction	KEGG PATHWAY	bta04512	5	87	0.000480839	0.0443333	LAMB3|LAMB2|THBS4|COL4A4|COL9A1	http://www.genome.jp/kegg-bin/show_pathway?bta04512/bta:520167%09red/bta:407107%09red/bta:541281%09red/bta:529939%09red/bta:282195%09red
Human papillomavirus infection	KEGG PATHWAY	bta05165	10	345	0.000216874	0.027267	COL9A1|LAMB2|NOTCH4|THBS4|MX1|WNT4|COL4A4|LAMB3|PPP2R2B|WNT11	http://www.genome.jp/kegg-bin/show_pathway?bta05165/bta:280872%09red/bta:509290%09red/bta:789600%09red/bta:407107%09red/bta:520167%09red/bta:613288%09red/bta:541281%09red/bta:282195%09red/bta:529939%09red/bta:536128%09red
#Term	Database	ID	Input number	Background number	P-Value	Corrected P-Value	Input	Hyperlink
cell surface	Gene Ontology	GO:0009986	11	325	2.73956e-05	0.0123024	LBP|SFRP1|NOTCH4|PCSK6|RAMP1|ATP5F1B|ADAMTS15|PLA2G1B|APOA4|FGFR2|CFTR	http://amigo.geneontology.org/amigo/term/GO:0009986
collagen-containing extracellular matrix	Gene Ontology	GO:0062023	6	85	4.44771e-05	0.0123024	SFRP1|THBS4|PCSK6|ADAMTS15|FGFR2|AMELX	http://amigo.geneontology.org/amigo/term/GO:0062023
extracellular matrix structural constituent	Gene Ontology	GO:0005201	4	44	0.000356708	0.0404846	LAMB3|COL4A4|FBLN1|COL9A1	http://amigo.geneontology.org/amigo/term/GO:0005201
extracellular space	Gene Ontology	GO:0005615	26	952	6.09762e-09	8.433e-06	CKM|CHGA|PCSK6|ADAMTS15|AHSG|PLA2G1B|LRRC3B|FBLN1|TMEM171|LBP|THBS4|PTX3|CCL22|PRTN3|NPPA|SFRP2|LIPC|COL9A1|CES2|RBP4|INHA|SFRP1|SEMA3F|WNT4|SERPINA3-8|WNT11	http://amigo.geneontology.org/amigo/term/GO:0005615
gene silencing by RNA	Gene Ontology	GO:0031047	3	18	0.000409823	0.0404846	TDRD1|MAEL|EXD1	http://amigo.geneontology.org/amigo/term/GO:0031047
integral component of plasma membrane	Gene Ontology	GO:0005887	18	677	2.19121e-06	0.00151522	PCDH8|TSPAN18|KCNH6|SEMA3F|SLC24A4|SLC16A2|FGFR3|CFTR|MPZL1|TMEM150C|SLC16A10|SLCO2B1|PLPPR5|NTRK3|FGFR2|CDH4|MEP1B|ABCC11	http://amigo.geneontology.org/amigo/term/GO:0005887
negative regulation of epithelial to mesenchymal transition	Gene Ontology	GO:0010719	3	21	0.000614098	0.0471832	SFRP2|SFRP1|ADIPOR1	http://amigo.geneontology.org/amigo/term/GO:0010719
negative regulation of JUN kinase activity	Gene Ontology	GO:0043508	3	7	3.91393e-05	0.0123024	SFRP2|SFRP1|NPPA	http://amigo.geneontology.org/amigo/term/GO:0043508
negative regulation of peptidyl-tyrosine phosphorylation	Gene Ontology	GO:0050732	3	12	0.000144614	0.0222224	SFRP2|SFRP1|DMTN	http://amigo.geneontology.org/amigo/term/GO:0050732
oxygen transport	Gene Ontology	GO:0015671	3	14	0.000213905	0.027267	HBB|MB|HBE2	http://amigo.geneontology.org/amigo/term/GO:0015671
piRNA metabolic process	Gene Ontology	GO:0034587	3	11	0.000116291	0.0222224	TDRD1|MAEL|EXD1	http://amigo.geneontology.org/amigo/term/GO:0034587
positive regulation of neutrophil chemotaxis	Gene Ontology	GO:0090023	3	18	0.000409823	0.0404846	LBP|THBS4|NCKAP1L	http://amigo.geneontology.org/amigo/term/GO:0090023
response to endoplasmic reticulum stress	Gene Ontology	GO:0034976	4	50	0.000561093	0.0456466	CEBPB|THBS4|CFTR|ANKS4B	http://amigo.geneontology.org/amigo/term/GO:0034976
thyroid hormone generation	Gene Ontology	GO:0006590	3	11	0.000116291	0.0222224	SLC16A2|FOXE1|SLC16A10	http://amigo.geneontology.org/amigo/term/GO:0006590

## Sheet: TULA 
Functional enrichment pathways and GO terms of timepoint x group interactions for TULA vs NC (FDR < 0.05)
##Databases: KEGG PATHWAY, Reactome, Gene Ontology
##Statistical test method: hypergeometric test / Fisher's exact test
##FDR correction method: Benjamini and Hochberg
#Term	Database	ID	Input number	Background number	P-Value	Corrected P-Value	Input	Hyperlink
axon	Gene Ontology	GO:0030424	6	173	0.000159178	0.0177483	CPT1C|FEZ1|SYT4|SLC6A1|GABRD|SCN3A	http://amigo.geneontology.org/amigo/term/GO:0030424
calcium ion binding	Gene Ontology	GO:0005509	11	560	5.4058e-05	0.0142379	SYT4|PLS3|ACAN|CABP4|CAPN13|CALN1|FAT3|SPOCK1|PLA2G1B|CHGA|CALR3	http://amigo.geneontology.org/amigo/term/GO:0005509
carbohydrate binding	Gene Ontology	GO:0030246	5	117	0.000226086	0.0207283	CLEC10A|ACAN|KRT1|CALR3|GALNT9	http://amigo.geneontology.org/amigo/term/GO:0030246
defense response to Gram-positive bacterium	Gene Ontology	GO:0050830	4	66	0.000278856	0.0207283	CHGA|CATHL2|GBP6|PLA2G1B	http://amigo.geneontology.org/amigo/term/GO:0050830
extracellular matrix structural constituent	Gene Ontology	GO:0005201	4	44	6.38471e-05	0.0142379	COL27A1|LAMB3|PXDN|COL9A1	http://amigo.geneontology.org/amigo/term/GO:0005201
extracellular space	Gene Ontology	GO:0005615	14	952	0.000112153	0.0150061	LINGO2|CD1A|CHGA|CATHL2|COL9A1|COL27A1|RBP4|SPOCK1|PLA2G1B|TFPI|MUC4|SERPINB4|PXDN|LGI1	http://amigo.geneontology.org/amigo/term/GO:0005615
glutamatergic synapse	Gene Ontology	GO:0098978	6	215	0.000492047	0.0329179	CPT1C|ACAN|GRIK2|SYT4|LGI1|CACNG5	http://amigo.geneontology.org/amigo/term/GO:0098978
integral component of membrane	Gene Ontology	GO:0016021	34	3697	3.17985e-05	0.0142379	DNAH14|CLEC10A|CD1A|KREMEN2|PTGER3|LRRC66|TMEM116|GPRC5B|FAM163A|TMEM182|KLRJ1|ZBTB8B|KIR2DS1|WC1-8|AADACL3|ULBP13|TMEM121|EXTL1|ADGRF3|TMEM240|MUC4|GGT1|GALNT9|F11R|CALN1|BCAM|HHLA2|SFT2D2|GULO|FAT3|MLC1|ABCC6|TMEM151B|HRCT1	http://amigo.geneontology.org/amigo/term/GO:0016021
neuronal action potential	Gene Ontology	GO:0019228	3	17	9.42909e-05	0.0150061	GPR88|GRIK2|SCN3A	http://amigo.geneontology.org/amigo/term/GO:0019228
neuronal cell body	Gene Ontology	GO:0043025	5	156	0.00080399	0.0488972	PNOC|GABRD|GRIK2|TNN|SYT4	http://amigo.geneontology.org/amigo/term/GO:0043025
transmitter-gated ion channel activity involved in regulation of postsynaptic membrane potential	Gene Ontology	GO:1904315	3	25	0.000263966	0.0207283	GABRD|GRIK2|GRIA3	http://amigo.geneontology.org/amigo/term/GO:1904315
